# Supplementary material
Source: PubMed Central journal article supplement (PMC8366747)
Supplement: NIHMS1638058-supplement-Supplemental_Publication_Material.pdf [file NIHMS1638058-supplement-Supplemental_Publication_Material.pdf]

## **SUPPLEMENTAL MATERIAL**

### **Supplemental Methods**

#### Additional description of the Look AHEAD study design:

Eligibility criteria included age 45 to 76 years; self-reported type 2 diabetes mellitus (T2DM) with verification of anti-hyperglycemic medication use or medical records; and body mass index  $\geq 25$  kg/m<sup>2</sup> or  $\geq 27$  kg/m<sup>2</sup> if taking insulin. All participants had to complete a maximal exercise treadmill test at baseline. Participants with a history of bariatric surgery were excluded from enrolling in the trial.

#### Interventions:

Participants of the Look AHEAD trial were randomly assigned to either the intensive lifestyle intervention (ILI) or diabetes support and education (DSE) treatment groups.<sup>11, 12</sup> The ILI consisted of individual and group counseling sessions and strategies to achieve and maintain  $\geq 7\%$  weight loss, including caloric restriction (1,200-1,800 kcal/day) and increased physical activity ( $\geq 175$  minutes/week of moderate intensity physical activity). The DSE included less frequent group sessions focused on nutrition, exercise, and social support.

#### Covariates:

Baseline, 1- and 4-year follow-up dual-energy X-ray absorptiometry (DXA) scans were performed across the following study sites: Baton Rouge, Louisiana; Boston, Massachusetts; Houston, Texas; Los Angeles, California; Seattle, Washington.<sup>14, 15</sup> A Hologic QDR4500A fan beam densitometer was used at all sites except Boston, Massachusetts, which used a Hologic Delphi A densitometer. The regions of interest were the trunk, leg, and arm. Two-compartment models differentiated fat mass (FM) and fat-free mass. Fat-free mass was classified as bone mineral content versus soft tissue. The difference between fat-free mass and bone mineral

content was lean mass (LM). Differences across scanners were assessed using calibration phantoms (whole body, spine, hip, linearity). Regular scans of phantoms were performed for quality control and corrections were applied as previously described.<sup>15, 34</sup> The central DXA reading center (University of California at San Francisco) reviewed all scans. Participants who weighed >300 pounds were excluded from DXA assessment due to weight limits of the equipment. The coefficient of variation for FM and LM was 1.5% and 0.8%, respectively.<sup>15, 35</sup>

Participants underwent a baseline examination that included questionnaires and a clinical examination as previously described.<sup>11, 12, 36</sup> Demographics details (age, sex, race/ethnicity), education level completed, income, smoking history, alcohol use history, diabetes history, and medication use were self-reported. History of cardiovascular disease was defined based on prior myocardial infarction, stroke, transient ischemic attack, heart failure, or cardiovascular procedure, including percutaneous transluminal coronary angioplasty/stent, coronary artery bypass graft, aortic aneurysm repair, carotid endarterectomy, or angioplasty of lower extremity artery.<sup>37</sup> Blood pressure (BP) was measured in a seated position with an automated device in duplicate. History of hypertension was based on use of antihypertensive medication or BP  $\geq$ 140/90 mm Hg. Glycated hemoglobin (HbA1c) was measured at a core laboratory. Estimated glomerular filtration rate was calculated as previously described.<sup>38</sup> Cardiorespiratory fitness was assessed from a symptom-limited graded treadmill exercise test. At a constant treadmill speed that was selected based on a standardized protocol, study participants started the exercise test at 0% grade that increased incrementally by 1% every minute until voluntary exhaustion or standard stopping criteria were met.<sup>17</sup> During each stage and at the termination of the test protocol, heart rate and rating of perceived exertion were measured. Peak oxygen consumption was estimated based on speed and grade using established American College of Sports Medicine equations.<sup>39</sup>

**Supplemental Table I. Baseline characteristics stratified by baseline waist circumference tertiles**

|                                     | <b>Tertile 1<br/>70.8 to 107.3 cm<br/>(n=1,700)</b> | <b>Tertile 2<br/>107.4 to 118.7 cm<br/>(n=1,703)</b> | <b>Tertile 3<br/>118.8 to 210.8 cm<br/>(n=1,700)</b> | <b>P-value for<br/>WC tertiles</b> |
|-------------------------------------|-----------------------------------------------------|------------------------------------------------------|------------------------------------------------------|------------------------------------|
| Predicted fat mass, kg              | 33.9 (6.8)                                          | 40.4 (8.0)                                           | 50.8 (9.8)                                           | <0.001                             |
| Predicted lean mass, kg             | 48.4 (8.7)                                          | 56.3 (10.0)                                          | 66.3 (13.1)                                          | <0.001                             |
| Waist circumference, cm             | 99.5 (5.8)                                          | 112.8 (3.2)                                          | 129.4 (9.5)                                          | <0.001                             |
| Age, years                          | 58.9 (6.9)                                          | 59.2 (6.9)                                           | 58.0 (6.7)                                           | <0.001                             |
| Female, n (%)                       | 1,278 (75.2)                                        | 982 (57.7)                                           | 784 (46.1)                                           | <0.001                             |
| White, n (%)                        | 901 (53.0)                                          | 1,107 (65.0)                                         | 1,221 (71.8)                                         | <0.001                             |
| Education, n (%)                    |                                                     |                                                      |                                                      |                                    |
| <13 years                           | 396 (23.3)                                          | 325 (19.1)                                           | 290 (17.1)                                           | 0.001                              |
| 13-16 years                         | 606 (35.7)                                          | 642 (37.7)                                           | 655 (38.5)                                           |                                    |
| >16 years                           | 661 (38.9)                                          | 694 (40.8)                                           | 720 (42.4)                                           |                                    |
| Missing                             | 37 (2.2)                                            | 42 (2.5)                                             | 35 (2.1)                                             |                                    |
| Income, n (%)                       |                                                     |                                                      |                                                      |                                    |
| <\$20,000                           | 226 (13.3)                                          | 190 (11.2)                                           | 166 (9.8)                                            | <0.001                             |
| \$20,000-\$39,999                   | 358 (21.1)                                          | 304 (17.9)                                           | 317 (18.7)                                           |                                    |
| \$40,000-\$59,999                   | 310 (18.2)                                          | 303 (17.8)                                           | 333 (19.6)                                           |                                    |
| \$60,000-\$79,999                   | 208 (12.2)                                          | 247 (14.5)                                           | 288 (16.9)                                           |                                    |
| ≥\$80,000                           | 432 (25.4)                                          | 477 (28.0)                                           | 443 (26.1)                                           |                                    |
| Missing                             | 166 (9.8)                                           | 182 (10.7)                                           | 153 (9.0)                                            |                                    |
| Weight, kg                          | 84.0 (10.3)                                         | 98.7 (10.8)                                          | 119.3 (16.2)                                         | <0.001                             |
| BMI, kg/m <sup>2</sup>              | 31.4 (3.3)                                          | 35.3 (4.0)                                           | 41.1 (5.4)                                           | <0.001                             |
| Systolic BP, mm Hg                  | 127 (17)                                            | 129 (17)                                             | 131 (17)                                             | <0.001                             |
| Diastolic BP, mm Hg                 | 70 (9)                                              | 70 (10)                                              | 71 (10)                                              | 0.001                              |
| History of hypertension, n (%)      | 1,326 (78.0)                                        | 1,415 (83.1)                                         | 1,500 (88.2)                                         | <0.001                             |
| History of CVD, n (%)               | 191 (11.2)                                          | 231 (13.6)                                           | 254 (14.9)                                           | 0.006                              |
| Diabetes duration, years            | 6.6 (6.7)                                           | 6.9 (6.6)                                            | 6.9 (6.2)                                            | 0.36                               |
| Insulin use, n (%)                  | 195 (11.9)                                          | 277 (16.9)                                           | 311 (18.9)                                           | <0.001                             |
| Smoking, n (%)                      |                                                     |                                                      |                                                      | <0.001                             |
| Never                               | 962 (56.7)                                          | 848 (49.9)                                           | 749 (44.2)                                           |                                    |
| Past                                | 678 (40.0)                                          | 754 (44.3)                                           | 876 (51.7)                                           |                                    |
| Present                             | 57 (3.4)                                            | 99 (5.8)                                             | 69 (4.1)                                             |                                    |
| Alcohol, n (%)                      |                                                     |                                                      |                                                      | 0.09                               |
| None/week                           | 1,194 (70.4)                                        | 1,127 (66.5)                                         | 1,128 (66.6)                                         |                                    |
| 1-3/week                            | 299 (17.6)                                          | 343 (20.2)                                           | 345 (20.4)                                           |                                    |
| 4+/week                             | 203 (12.0)                                          | 226 (13.3)                                           | 221 (13.1)                                           |                                    |
| HbA1c, %                            | 7.2 (1.2)                                           | 7.3 (1.1)                                            | 7.4 (1.2)                                            | <0.001                             |
| GFR, mL/min per 1.73 m <sup>2</sup> | 90.0 (15.8)                                         | 88.8 (15.9)                                          | 90.3 (16.3)                                          | 0.01                               |
| LDL-C, mg/dL                        | 115 (33)                                            | 111 (32)                                             | 110 (31)                                             | <0.001                             |
| Estimated CRF, METs                 | 7.8 (2.1)                                           | 7.3 (1.9)                                            | 6.5 (1.7)                                            | <0.001                             |
| ILI treatment group, n (%)          | 863 (50.8)                                          | 848 (49.8)                                           | 835 (49.1)                                           | 0.63                               |

Categorical data presented as n (percentage) and continuous data presented as mean (standard deviation). Comparison across groups performed using generalized linear models.

BMI = body mass index; BP = blood pressure; CRF = cardiorespiratory fitness; CVD = cardiovascular disease; FM = fat mass; GFR = glomerular filtration rate; HbA1c = glycated hemoglobin; ILI = intensive lifestyle intervention; LDL-C = low-density lipoprotein cholesterol; LM = lean mass; METs = metabolic equivalents; WC = waist circumference

**Supplemental Table II. Baseline and follow-up characteristics stratified by year 1 percent change in predicted fat mass and predicted lean mass tertiles**

|                                     | 1-year change in predicted fat mass     |                                         |                                         | 1-year change in predicted lean mass     |                                          |                                         | P-value for FM tertiles | P-value for LM tertiles |
|-------------------------------------|-----------------------------------------|-----------------------------------------|-----------------------------------------|------------------------------------------|------------------------------------------|-----------------------------------------|-------------------------|-------------------------|
|                                     | Tertile 1<br>-65.5 to -10%<br>(n=1,608) | Tertile 2<br>-9.9 to -1.5%<br>(n=1,609) | Tertile 3<br>-1.4 to 53.7%<br>(n=1,609) | Tertile 1<br>-39.9 to -4.6%<br>(n=1,608) | Tertile 2<br>-4.5% to -0.7%<br>(n=1,609) | Tertile 3<br>-0.6 to 73.3%<br>(n=1,609) |                         |                         |
| <b>Baseline variables</b>           |                                         |                                         |                                         |                                          |                                          |                                         |                         |                         |
| Predicted fat mass, kg              | 40.8 (10.8)                             | 42.4 (10.8)                             | 41.9 (10.6)                             | 42.0 (10.9)                              | 41.3 (10.6)                              | 41.7 (10.7)                             | <0.001                  | 0.24                    |
| Predicted lean mass, kg             | 57.6 (12.9)                             | 56.3 (13.0)                             | 57.2 (13.3)                             | 58.6 (13.9)                              | 55.9 (12.7)                              | 56.6 (12.5)                             | 0.02                    | <0.001                  |
| Waist circumference, cm             | 113.8 (14.6)                            | 113.9 (13.6)                            | 113.8 (13.8)                            | 114.3 (14.1)                             | 112.6 (13.4)                             | 114.7 (14.4)                            | 0.99                    | <0.001                  |
| Age, years                          | 59.3 (6.9)                              | 58.6 (6.7)                              | 58.2 (6.9)                              | 59.0 (6.8)                               | 58.8 (6.8)                               | 58.4 (6.9)                              | <0.001                  | 0.03                    |
| Female, n (%)                       | 848 (52.7)                              | 1,033 (64.2)                            | 988 (61.4)                              | 913 (56.8)                               | 1,022 (63.5)                             | 934 (58.1)                              | <0.001                  | <0.001                  |
| White, n (%)                        | 1,120 (69.7)                            | 982 (61.0)                              | 966 (60.0)                              | 1,128 (70.2)                             | 954 (59.3)                               | 986 (61.3)                              | <0.001                  | <0.001                  |
| Education, n (%)                    |                                         |                                         |                                         |                                          |                                          |                                         |                         |                         |
| <13 years                           | 313 (19.5)                              | 311 (19.3)                              | 324 (20.1)                              | 308 (19.2)                               | 321 (20.0)                               | 319 (19.8)                              | 0.008                   | 0.01                    |
| 13-16 years                         | 539 (33.5)                              | 628 (39.0)                              | 626 (38.9)                              | 549 (34.1)                               | 620 (38.5)                               | 624 (38.8)                              |                         |                         |
| >16 years                           | 720 (44.8)                              | 634 (39.4)                              | 623 (38.7)                              | 720 (44.8)                               | 630 (39.2)                               | 627 (39.0)                              |                         |                         |
| Missing                             | 36 (2.2)                                | 36 (2.2)                                | 36 (2.2)                                | 31 (1.9)                                 | 38 (2.4)                                 | 39 (2.4)                                |                         |                         |
| Income, n (%)                       |                                         |                                         |                                         |                                          |                                          |                                         |                         |                         |
| <\$20,000                           | 169 (10.5)                              | 189 (11.8)                              | 180 (11.2)                              | 162 (10.1)                               | 187 (11.6)                               | 189 (11.8)                              | 0.002                   | 0.05                    |
| \$20,000-\$39,999                   | 290 (18.0)                              | 323 (20.1)                              | 310 (19.3)                              | 286 (17.8)                               | 337 (20.9)                               | 300 (18.7)                              |                         |                         |
| \$40,000-\$59,999                   | 279 (17.4)                              | 302 (18.8)                              | 316 (19.6)                              | 286 (17.8)                               | 297 (18.5)                               | 314 (19.5)                              |                         |                         |
| \$60,000-\$79,999                   | 228 (14.2)                              | 248 (15.4)                              | 241 (15.0)                              | 234 (14.6)                               | 239 (14.9)                               | 244 (15.2)                              |                         |                         |
| ≥\$80,000                           | 481 (29.9)                              | 368 (22.9)                              | 430 (26.7)                              | 473 (29.4)                               | 391 (24.3)                               | 415 (25.8)                              |                         |                         |
| Missing                             | 161 (10.0)                              | 179 (11.1)                              | 132 (8.2)                               | 167 (10.4)                               | 158 (9.8)                                | 147 (9.1)                               |                         |                         |
| Weight, kg                          | 100.2 (19.1)                            | 100.6 (19.4)                            | 101.1 (19.2)                            | 102.4 (20.1)                             | 99.1 (19.0)                              | 100.4 (18.6)                            | 0.41                    | <0.001                  |
| BMI, kg/m <sup>2</sup>              | 35.4 (5.8)                              | 36.1 (5.9)                              | 36.2 (5.9)                              | 36.3 (5.9)                               | 35.6 (5.8)                               | 35.9 (5.9)                              | <0.001                  | 0.006                   |
| Systolic BP, mm Hg                  | 129 (17)                                | 129 (17)                                | 129 (17)                                | 129 (17)                                 | 129 (17)                                 | 129 (17)                                | 0.82                    | 0.77                    |
| Diastolic BP, mm Hg                 | 70 (10)                                 | 70 (10)                                 | 70 (10)                                 | 70 (10)                                  | 70 (10)                                  | 70 (10)                                 | 0.70                    | 0.16                    |
| History of hypertension, n (%)      | 1,359 (84.5)                            | 1,326 (82.4)                            | 1,327 (82.5)                            | 1,368 (85.1)                             | 1,315 (81.7)                             | 1,329 (82.6)                            | 0.19                    | 0.03                    |
| History of CVD, n (%)               | 205 (12.8)                              | 196 (12.2)                              | 227 (14.1)                              | 199 (12.4)                               | 203 (12.6)                               | 226 (14.1)                              | 0.25                    | 0.31                    |
| Diabetes duration, years            | 6.7 (6.5)                               | 6.9 (6.8)                               | 6.7 (6.3)                               | 6.7 (6.6)                                | 6.8 (6.6)                                | 6.8 (6.4)                               | 0.69                    | 0.92                    |
| Insulin use, n (%)                  | 202 (12.9)                              | 253 (16.3)                              | 274 (17.7)                              | 212 (13.6)                               | 250 (16.1)                               | 267 (17.3)                              | <0.001                  | 0.02                    |
| Smoking, n (%)                      |                                         |                                         |                                         |                                          |                                          |                                         |                         |                         |
| Never                               | 764 (47.6)                              | 847 (52.8)                              | 832 (51.8)                              | 779 (48.5)                               | 851 (53.1)                               | 813 (50.6)                              | 0.02                    | 0.07                    |
| Past                                | 774 (48.2)                              | 683 (42.6)                              | 711 (44.2)                              | 764 (47.6)                               | 684 (42.7)                               | 720 (44.8)                              |                         |                         |
| Present                             | 67 (4.2)                                | 74 (4.6)                                | 64 (4.0)                                | 63 (3.9)                                 | 68 (4.2)                                 | 74 (4.6)                                |                         |                         |
| Alcohol, n (%)                      |                                         |                                         |                                         |                                          |                                          |                                         |                         |                         |
| None/week                           | 1,053 (65.6)                            | 1,075 (67.1)                            | 1,122 (70.0)                            | 1,074 (66.9)                             | 1,072 (66.9)                             | 1,104 (68.8)                            | 0.03                    | 0.45                    |
| 1-3/week                            | 320 (19.9)                              | 332 (20.7)                              | 285 (17.8)                              | 309 (19.3)                               | 330 (20.6)                               | 298 (18.6)                              |                         |                         |
| 4+/week                             | 233 (14.5)                              | 195 (12.2)                              | 196 (12.2)                              | 222 (13.8)                               | 200 (12.5)                               | 202 (12.6)                              |                         |                         |
| HbA1c, %                            | 7.1 (1.1)                               | 7.4 (1.2)                               | 7.3 (1.2)                               | 7.1 (1.1)                                | 7.4 (1.2)                                | 7.3 (1.3)                               | <0.001                  | <0.001                  |
| GFR, mL/min per 1.73 m <sup>2</sup> | 88.4 (16.0)                             | 90.2 (15.8)                             | 90.3 (16.0)                             | 88.9 (16.0)                              | 90.0 (15.9)                              | 90.1 (15.9)                             | <0.001                  | 0.06                    |
| LDL-C, mg/dL                        | 110 (32)                                | 113 (32)                                | 113 (32)                                | 110 (33)                                 | 114 (31)                                 | 112 (33)                                | 0.04                    | 0.006                   |
| Estimated CRF, METs                 | 7.4 (2.0)                               | 7.1 (2.0)                               | 7.2 (2.0)                               | 7.1 (1.8)                                | 6.9 (1.9)                                | 7.6 (2.1)                               | <0.001                  | <0.001                  |
| ILI treatment group, n (%)          | 1,392 (86.6)                            | 757 (47.1)                              | 284 (17.7)                              | 1,321 (82.2)                             | 764 (47.5)                               | 348 (21.6)                              | <0.001                  | <0.001                  |

|                                  | 1-year change in predicted fat mass     |                                         |                                         | 1-year change in predicted lean mass     |                                          |                                         | P-value for FM tertiles | P-value for LM tertiles |
|----------------------------------|-----------------------------------------|-----------------------------------------|-----------------------------------------|------------------------------------------|------------------------------------------|-----------------------------------------|-------------------------|-------------------------|
|                                  | Tertile 1<br>-65.5 to -10%<br>(n=1,608) | Tertile 2<br>-9.9 to -1.5%<br>(n=1,609) | Tertile 3<br>-1.4 to 53.7%<br>(n=1,609) | Tertile 1<br>-39.9 to -4.6%<br>(n=1,608) | Tertile 2<br>-4.5% to -0.7%<br>(n=1,609) | Tertile 3<br>-0.6 to 73.3%<br>(n=1,609) |                         |                         |
| <b>Year 1 variables</b>          |                                         |                                         |                                         |                                          |                                          |                                         |                         |                         |
| Predicted fat mass, kg           | 32.7 (96.1)                             | 40.1 (10.3)                             | 43.5 (11.0)                             | 34.8 (10.4)                              | 39.3 (10.7)                              | 42.2 (11.4)                             | <0.001                  | <0.001                  |
| Change in predicted fat mass, %  | -20.0 (8.8)                             | -5.3 (2.5)                              | 4.0 (5.0)                               | -17.3 (11.0)                             | -5.1 (6.8)                               | 1.1 (7.7)                               | <0.001                  | <0.001                  |
| Predicted lean mass, kg          | 53.3 (11.9)                             | 55.0 (12.6)                             | 57.6 (13.3)                             | 53.6 (12.5)                              | 54.5 (12.4)                              | 57.9 (12.8)                             | <0.001                  | <0.001                  |
| Change in predicted lean mass, % | -7.2 (5.9)                              | -2.3 (2.9)                              | 0.8 (3.3)                               | -8.6 (3.9)                               | -2.4 (1.1)                               | 2.2 (3.5)                               | <0.001                  | <0.001                  |
| Waist circumference, cm          | 102.4 (12.9)                            | 110.8 (13.3)                            | 115.6 (14.0)                            | 104.9 (14.4)                             | 109.9 (13.6)                             | 114.0 (13.9)                            | <0.001                  | <0.001                  |
| Change in waist circumference, % | -9.8 (5.9)                              | -2.7 (4.1)                              | 1.6 (5.0)                               | -8.2 (6.8)                               | -2.4 (5.3)                               | -0.4 (6.0)                              | <0.001                  | <0.001                  |
| Change in systolic BP, mmHg      | -8.7 (16.9)                             | -4.0 (16.5)                             | -1.7 (17.1)                             | -8.5 (17.2)                              | -4.5 (16.8)                              | -1.4 (16.5)                             | <0.001                  | <0.001                  |
| Change in systolic BP, %         | -6.0 (13.0)                             | -2.3 (12.6)                             | -0.5 (13.4)                             | -5.8 (13.2)                              | -2.7 (12.9)                              | -0.3 (12.9)                             | <0.001                  | <0.001                  |
| Change in HbA1c, %               | -9.6 (12.2)                             | -3.7 (12.0)                             | -0.4 (12.5)                             | -9.0 (12.8)                              | -3.7 (12.3)                              | -1.0 (12.0)                             | <0.001                  | <0.001                  |

Categorical data presented as n (percentage) and continuous data presented as mean (standard deviation). Comparison across groups performed using generalized linear models. Follow-up variables were assessed post-baseline visit.

BMI = body mass index; BP = blood pressure; CRF = cardiorespiratory fitness; CVD = cardiovascular disease; FM = fat mass; GFR = glomerular filtration rate; HbA1c = glycated hemoglobin; ILI = intensive lifestyle intervention; LDL-C = low-density lipoprotein cholesterol; LM = lean mass; METs = metabolic equivalents; MI = myocardial infarction; WC = waist circumference

**Supplemental Table III. Baseline and follow-up characteristics stratified by year 4 percent change in predicted fat mass and predicted lean mass tertiles**

| Variable                            | 4-year change in predicted fat mass      |                                        |                                        | 4-year change in predicted lean mass     |                                         |                                      | P-value for FM tertiles | P-value for LM tertiles |
|-------------------------------------|------------------------------------------|----------------------------------------|----------------------------------------|------------------------------------------|-----------------------------------------|--------------------------------------|-------------------------|-------------------------|
|                                     | Tertile 1<br>-61.9 to -7.3%<br>(n=1,528) | Tertile 2<br>-7.2 to 1.8%<br>(n=1,528) | Tertile 3<br>1.9 to 89.2%<br>(n=1,529) | Tertile 1<br>-44.7 to -4.6%<br>(n=1,528) | Tertile 2<br>-4.5 to -0.1%<br>(n=1,528) | Tertile 3<br>0 to 64.4%<br>(n=1,529) |                         |                         |
| <b>Baseline variables</b>           |                                          |                                        |                                        |                                          |                                         |                                      |                         |                         |
| Predicted fat mass, kg              | 41.9 (11.4)                              | 42.1 (10.4)                            | 40.9 (10.4)                            | 42.6 (11.2)                              | 40.5 (10.2)                             | 41.9 (10.6)                          | 0.005                   | <0.001                  |
| Predicted lean mass, kg             | 57.3 (12.8)                              | 56.5 (13.0)                            | 57.0 (13.2)                            | 57.7 (13.6)                              | 56.3 (12.5)                             | 56.8 (12.8)                          | 0.26                    | 0.009                   |
| Waist circumference, cm             | 114.6 (14.6)                             | 113.8 (13.5)                           | 112.8 (13.6)                           | 114.5 (14.0)                             | 112.2 (13.2)                            | 114.6 (14.4)                         | 0.002                   | <0.001                  |
| Age, years                          | 59.4 (6.9)                               | 58.6 (6.8)                             | 58.0 (6.7)                             | 59.1 (6.9)                               | 59.0 (6.7)                              | 57.9 (6.8)                           | <0.001                  | <0.001                  |
| Female, n (%)                       | 865 (56.6)                               | 973 (63.6)                             | 905 (59.2)                             | 932 (61.0)                               | 919 (60.1)                              | 892 (58.3)                           | <0.001                  | 0.31                    |
| White, n (%)                        | 994 (65.1)                               | 961 (62.9)                             | 967 (63.2)                             | 989 (64.8)                               | 945 (61.8)                              | 988 (64.6)                           | 0.42                    | <0.001                  |
| Education, n (%)                    |                                          |                                        |                                        |                                          |                                         |                                      |                         |                         |
| <13 years                           | 309 (20.2)                               | 296 (19.4)                             | 293 (19.2)                             | 349 (22.8)                               | 278 (18.2)                              | 271 (17.7)                           | 0.11                    | 0.001                   |
| 13-16 years                         | 519 (34.0)                               | 576 (37.7)                             | 601 (39.3)                             | 525 (34.4)                               | 566 (37.0)                              | 605 (39.6)                           |                         |                         |
| >16 years                           | 666 (43.6)                               | 620 (40.6)                             | 601 (39.3)                             | 624 (40.8)                               | 641 (41.9)                              | 622 (40.7)                           |                         |                         |
| Missing                             | 34 (2.2)                                 | 37 (2.4)                               | 34 (2.2)                               | 30 (2.0)                                 | 44 (2.9)                                | 31 (2.0)                             |                         |                         |
| Income, n (%)                       |                                          |                                        |                                        |                                          |                                         |                                      |                         |                         |
| <\$20,000                           | 168 (11.0)                               | 171 (11.2)                             | 158 (10.3)                             | 190 (12.4)                               | 165 (10.8)                              | 142 (9.3)                            | 0.42                    | 0.04                    |
| \$20,000-\$39,999                   | 304 (19.9)                               | 271 (17.7)                             | 300 (19.6)                             | 308 (20.2)                               | 293 (19.2)                              | 274 (17.9)                           |                         |                         |
| \$40,000-\$59,999                   | 279 (18.3)                               | 274 (17.9)                             | 302 (19.8)                             | 281 (18.4)                               | 272 (17.8)                              | 302 (19.8)                           |                         |                         |
| \$60,000-\$79,999                   | 206 (13.5)                               | 251 (16.4)                             | 228 (14.9)                             | 201 (13.2)                               | 231 (15.1)                              | 253 (16.6)                           |                         |                         |
| ≥\$80,000                           | 413 (27.0)                               | 418 (27.3)                             | 396 (25.9)                             | 390 (25.5)                               | 420 (27.5)                              | 417 (27.3)                           |                         |                         |
| Missing                             | 158 (10.3)                               | 144 (9.4)                              | 145 (9.5)                              | 158 (10.3)                               | 148 (9.7)                               | 141 (9.2)                            |                         |                         |
| Weight, kg                          | 101.1 (19.5)                             | 100.5 (19.0)                           | 100.0 (18.8)                           | 102.2 (20.2)                             | 98.7 (18.1)                             | 100.6 (18.9)                         | 0.29                    | <0.001                  |
| BMI, kg/m <sup>2</sup>              | 35.9 (6.2)                               | 36.0 (5.7)                             | 35.7 (5.7)                             | 36.6 (6.1)                               | 35.2 (5.5)                              | 35.9 (5.9)                           | 0.30                    | <0.001                  |
| Systolic BP, mm Hg                  | 128 (17)                                 | 129 (17)                               | 128 (17)                               | 130 (17)                                 | 129 (17)                                | 128 (16)                             | 0.61                    | 0.01                    |
| Diastolic BP, mm Hg                 | 70 (10)                                  | 70 (10)                                | 70 (9)                                 | 70 (10)                                  | 70 (9)                                  | 70 (10)                              | 0.71                    | 0.82                    |
| History of hypertension, n (%)      | 1,268 (83.0)                             | 1,255 (82.1)                           | 1,276 (83.5)                           | 1,292 (84.6)                             | 1,243 (81.3)                            | 1,264 (82.7)                         | 0.59                    | 0.06                    |
| History of CVD, n (%)               | 203 (13.3)                               | 177 (11.6)                             | 203 (13.3)                             | 208 (13.6)                               | 188 (12.3)                              | 187 (12.2)                           | 0.26                    | 0.43                    |
| Diabetes duration, years            | 6.6 (6.3)                                | 6.5 (6.5)                              | 7.1 (6.7)                              | 6.6 (6.4)                                | 6.6 (6.6)                               | 7.0 (6.6)                            | 0.03                    | 0.23                    |
| Insulin use, n (%)                  | 209 (14.2)                               | 225 (15.2)                             | 249 (16.9)                             | 216 (14.6)                               | 219 (14.8)                              | 248 (16.9)                           | 0.12                    | 0.17                    |
| Smoking, n (%)                      |                                          |                                        |                                        |                                          |                                         |                                      |                         |                         |
| Never                               | 764 (50.2)                               | 784 (51.3)                             | 785 (51.4)                             | 775 (51.0)                               | 782 (51.2)                              | 776 (50.8)                           | 0.85                    | >0.99                   |
| Past                                | 688 (45.2)                               | 684 (44.8)                             | 678 (44.4)                             | 681 (44.8)                               | 680 (44.5)                              | 689 (45.1)                           |                         |                         |
| Present                             | 70 (4.6)                                 | 59 (3.9)                               | 63 (4.1)                               | 65 (4.3)                                 | 65 (4.3)                                | 62 (4.1)                             |                         |                         |
| Alcohol, n (%)                      |                                          |                                        |                                        |                                          |                                         |                                      |                         |                         |
| None/week                           | 1,037 (68.0)                             | 1,014 (66.6)                           | 1,028 (67.6)                           | 1,084 (71.1)                             | 1,003 (65.8)                            | 992 (65.2)                           | 0.75                    | 0.004                   |
| 1-3/week                            | 299 (19.6)                               | 295 (19.4)                             | 299 (19.7)                             | 271 (17.8)                               | 305 (20.0)                              | 317 (20.8)                           |                         |                         |
| 4+/week                             | 190 (12.5)                               | 214 (14.1)                             | 194 (12.8)                             | 169 (11.1)                               | 216 (14.2)                              | 213 (14.0)                           |                         |                         |
| HbA1c, %                            | 7.2 (1.1)                                | 7.3 (1.2)                              | 7.3 (1.2)                              | 7.2 (1.1)                                | 7.3 (1.1)                               | 7.3 (1.2)                            | 0.26                    | 0.39                    |
| GFR, mL/min per 1.73 m <sup>2</sup> | 89.6 (15.6)                              | 90.0 (16.3)                            | 89.9 (15.7)                            | 89.8 (15.8)                              | 89.7 (15.9)                             | 90.1 (16.0)                          | 0.78                    | 0.74                    |
| LDL, mg/dL                          | 110 (31)                                 | 113 (32)                               | 113 (34)                               | 112 (32)                                 | 112 (32)                                | 113 (33)                             | 0.03                    | 0.61                    |
| Estimated CRF, METs                 | 7.2 (2)                                  | 7.2 (1.9)                              | 7.3 (2.0)                              | 7.1 (1.9)                                | 7.4 (2.0)                               | 7.3 (2.0)                            | <0.001                  | 0.06                    |
| ILI treatment group, n (%)          | 973 (63.7)                               | 762 (49.8)                             | 575 (37.6)                             | 953 (62.4)                               | 777 (50.8)                              | 580 (37.9)                           | <0.001                  | <0.001                  |

| Variable                         | 4-year change in predicted fat mass      |                                        |                                        | 4-year change in predicted lean mass     |                                         |                                      | P-value for FM tertiles | P-value for LM tertiles |
|----------------------------------|------------------------------------------|----------------------------------------|----------------------------------------|------------------------------------------|-----------------------------------------|--------------------------------------|-------------------------|-------------------------|
|                                  | Tertile 1<br>-61.9 to -7.3%<br>(n=1,528) | Tertile 2<br>-7.2 to 1.8%<br>(n=1,528) | Tertile 3<br>1.9 to 89.2%<br>(n=1,529) | Tertile 1<br>-44.7 to -4.6%<br>(n=1,528) | Tertile 2<br>-4.5 to -0.1%<br>(n=1,528) | Tertile 3<br>0 to 64.4%<br>(n=1,529) |                         |                         |
| <b>Year 4 variables</b>          |                                          |                                        |                                        |                                          |                                         |                                      |                         |                         |
| Predicted fat mass, kg           | 34.8 (9.7)                               | 41.0 (10.2)                            | 44.8 (11.5)                            | 36.7 (10.1)                              | 39.6 (10.3)                             | 44.3 (11.9)                          | <0.001                  | <0.001                  |
| Change in predicted fat mass, %  | -16.5 (8.7)                              | -2.56 (2.5)                            | 9.6 (7.6)                              | -13.3 (11.7)                             | -2.1 (7.4)                              | 5.9 (10.3)                           | <0.001                  | <0.001                  |
| Predicted lean mass, kg          | 53.1 (11.9)                              | 55.3 (12.9)                            | 58.1 (13.6)                            | 52.5 (12.2)                              | 55.1 (12.3)                             | 59.0 (13.5)                          | <0.001                  | <0.001                  |
| Change in predicted lean mass, % | -7.2 (6.4)                               | -2.1 (3.2)                             | 2.0 (5.1)                              | -8.9 (4.5)                               | -2.3 (1.2)                              | 3.7 (4.2)                            | <0.001                  | <0.001                  |
| Waist circumference, cm          | 105.1 (12.9)                             | 112.5 (13.3)                           | 117.5 (14.7)                           | 107.3 (14.2)                             | 111.1 (13.3)                            | 116.8 (14.6)                         | <0.001                  | <0.001                  |
| Change in waist circumference, % | -8.0 (6.3)                               | -1.0 (4.3)                             | 4.2 (6.2)                              | -6.1 (7.9)                               | -0.9 (5.4)                              | 2.2 (6.8)                            | <0.001                  | <0.001                  |
| Change in systolic BP, mmHg      | -7.0 (18.7)                              | -2.9 (19.4)                            | -2.1 (18.9)                            | -7.7 (18.9)                              | -3.4 (18.8)                             | -0.9 (19.2)                          | <0.001                  | <0.001                  |
| Change in systolic BP, %         | -4.6 (14.3)                              | -1.4 (14.9)                            | -0.6 (15.1)                            | -5.1 (14.4)                              | -1.7 (14.4)                             | 0.2 (15.3)                           | <0.001                  | <0.001                  |
| Change in HbA1c, %               | -4.6 (19.0)                              | 0.6 (16.0)                             | 0.8 (17.5)                             | -4.0 (19.3)                              | 0.1 (15.8)                              | 0.8 (17.4)                           | <0.001                  | <0.001                  |

Categorical data presented as n (percentage) and continuous data presented as mean (standard deviation). Comparison across groups performed using generalized linear models. Follow-up variables were assessed post-baseline visit.

BMI = body mass index; BP = blood pressure; CRF = cardiorespiratory fitness; CVD = cardiovascular disease; FM = fat mass; GFR = glomerular filtration rate; HbA1c = glycated hemoglobin; ILI = intensive lifestyle intervention; LDL = low-density lipoprotein; LM = lean mass; METs = metabolic equivalents; MI = myocardial infarction; WC = waist circumference

**Supplemental Table IV. Multivariable adjusted associations of changes in body composition measures from baseline to 4-year follow-up with risk of HF events**

|                                                                                  | Person-years | Event rate per 1,000 person years | Model 1              |         | Model 2               |         |
|----------------------------------------------------------------------------------|--------------|-----------------------------------|----------------------|---------|-----------------------|---------|
|                                                                                  |              |                                   | HR (95% CI)          | P value | HR (95% CI)           | P value |
| <i>Per 10% decrease in predicted fat mass from baseline to 4-year follow-up</i>  |              |                                   |                      |         |                       |         |
| <b>Overall HF</b>                                                                | 54,590       | 3.28                              | 0.73<br>(0.64, 0.84) | <0.001  | 0.77<br>(0.65, 0.91)  | 0.002   |
| <b>HFpEF</b>                                                                     | 54,478       | 1.63                              | 0.68<br>(0.56, 0.81) | <0.001  | 0.78<br>(0.60, 0.998) | 0.048   |
| <b>HFrEF</b>                                                                     | 54,478       | 1.40                              | 0.81<br>(0.66, 0.99) | 0.04    | 0.77<br>(0.61, 0.97)  | 0.03    |
| <i>Per 10% decrease in predicted lean mass from baseline to 4-year follow-up</i> |              |                                   |                      |         |                       |         |
| <b>Overall HF</b>                                                                | 54,590       | 3.28                              | 0.65<br>(0.50, 0.83) | <0.001  | 0.93<br>(0.66, 1.31)  | 0.67    |
| <b>HFpEF</b>                                                                     | 54,478       | 1.63                              | 0.49<br>(0.35, 0.69) | <0.001  | 0.69<br>(0.42, 1.12)  | 0.14    |
| <b>HFrEF</b>                                                                     | 54,478       | 1.40                              | 0.93<br>(0.62, 1.39) | 0.72    | 1.32<br>(0.81, 2.14)  | 0.26    |
| <i>Per 10% decrease in waist circumference from baseline to 4-year follow-up</i> |              |                                   |                      |         |                       |         |
| <b>Overall HF</b>                                                                | 54,710       | 3.31                              | 0.67<br>(0.56, 0.81) | <0.001  | 0.68<br>(0.56, 0.83)  | <0.001  |
| <b>HFpEF</b>                                                                     | 54,598       | 1.67                              | 0.61<br>(0.46, 0.80) | <0.001  | 0.61<br>(0.46, 0.82)  | <0.001  |
| <b>HFrEF</b>                                                                     | 54,598       | 1.39                              | 0.75<br>(0.56, 1.02) | 0.07    | 0.77<br>(0.56, 1.06)  | 0.11    |

Multivariable adjusted Cox proportional hazard models were constructed for each HF outcome and body composition exposure variable with sequential adjustment for potential confounders

Model 1 included age, sex, race/ethnicity, education, income, treatment group, baseline CRF, history of hypertension, systolic BP, smoking status, alcohol use status, estimated GFR, diabetes duration, insulin use, HbA1c, history of CVD

Model 2 included Model 1 covariates plus year 4 percent change in predicted fat mass (except for WC model), year 4 percent change in predicted lean mass (except for WC model), year 4 percent change in HbA1c, year 4 percent change in systolic BP

Abbreviations: BP = blood pressure; CI = confidence interval; CRF = cardiorespiratory fitness; CVD = cardiovascular disease; GFR = glomerular filtration rate; HbA1c = glycated hemoglobin; HF = heart failure; HFpEF = heart failure with preserved ejection fraction; HFrEF = heart failure with reduced ejection fraction; HR = hazard ratio; WC = waist circumference



**Supplemental Figure I. CONSORT flow diagram of study participants**

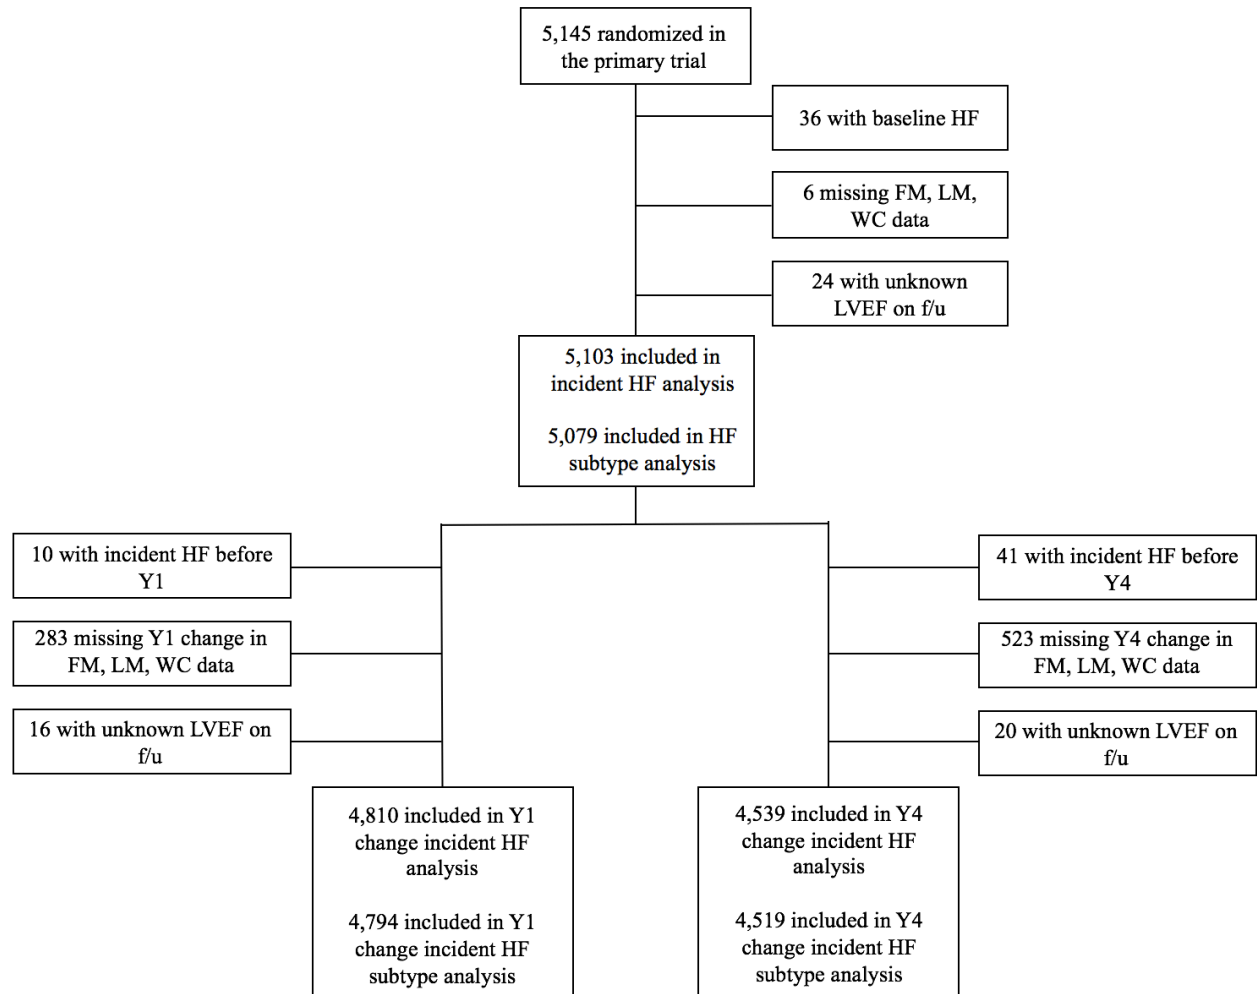

*Abbreviations: f/u = follow-up; FM = fat mass; HF = heart failure; LM = lean mass; LVEF = left ventricular ejection fraction; WC = waist circumference; Y = year*

**Supplemental Figure II. Bland-Altman plots of predicted versus measured fat mass (A, C) and lean mass (B, D) at years 1 (n=1,279) and 4 (n=1,166)**

Solid red line is the mean of difference (dashed red line is +/- 2 standard deviations and dashed green line is +/- 3 standard deviations).

For year 1 predicted and measured fat mass, the bias (95% limits of agreement) was 0.06 (-0.13 to 0.24) kg and  $R^2 = 0.91$ .  
For year 1 predicted and measured lean mass, the bias (95% limits of agreement) was 0.53 (0.33 to 0.73) kg and  $R^2 = 0.92$ .  
For year 4 predicted and measured fat mass, the bias (95% limits of agreement) was -0.60 (-0.80 to -0.39) kg and  $R^2 = 0.89$ .  
For year 4 predicted and measured lean mass, the bias (95% limits of agreement) was 0.94 (0.73 to 1.15) kg and  $R^2 = 0.91$ .

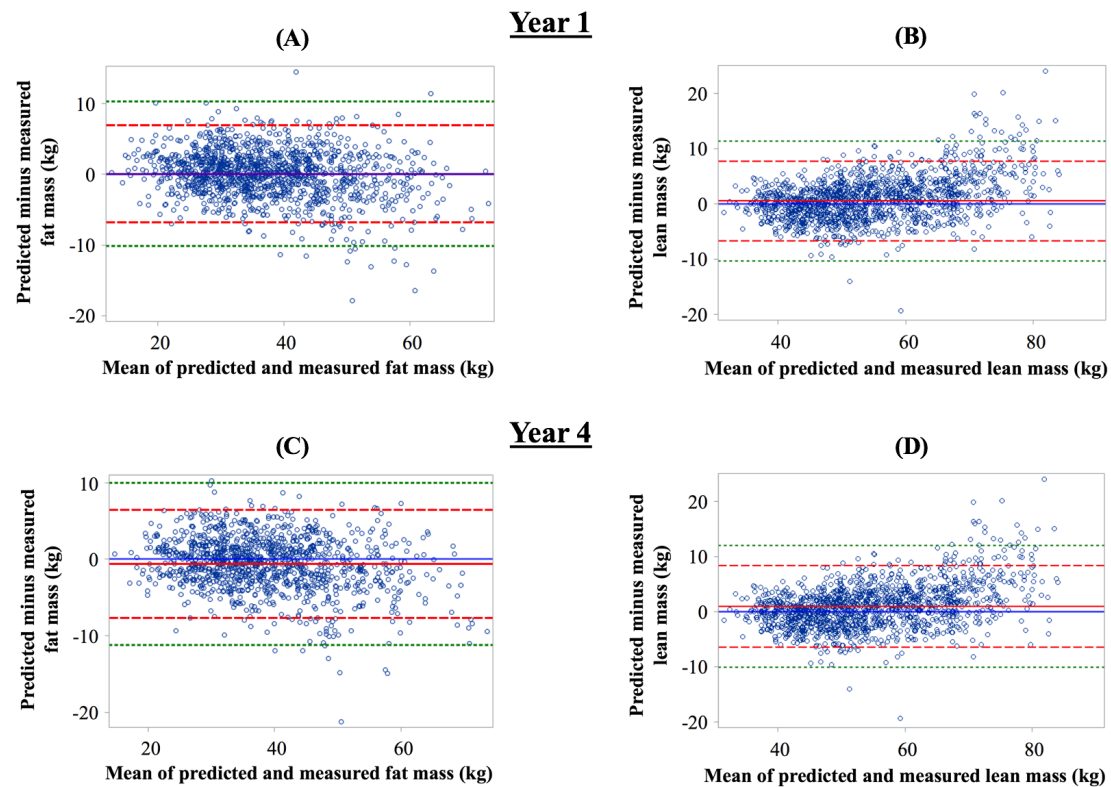

**Supplemental Figure III. Multivariable adjusted associations of baseline body composition measures with risk of HFpEF and HFrEF among all study participants (blue/squares) and those with no prior history of cardiovascular disease (orange/circles)**

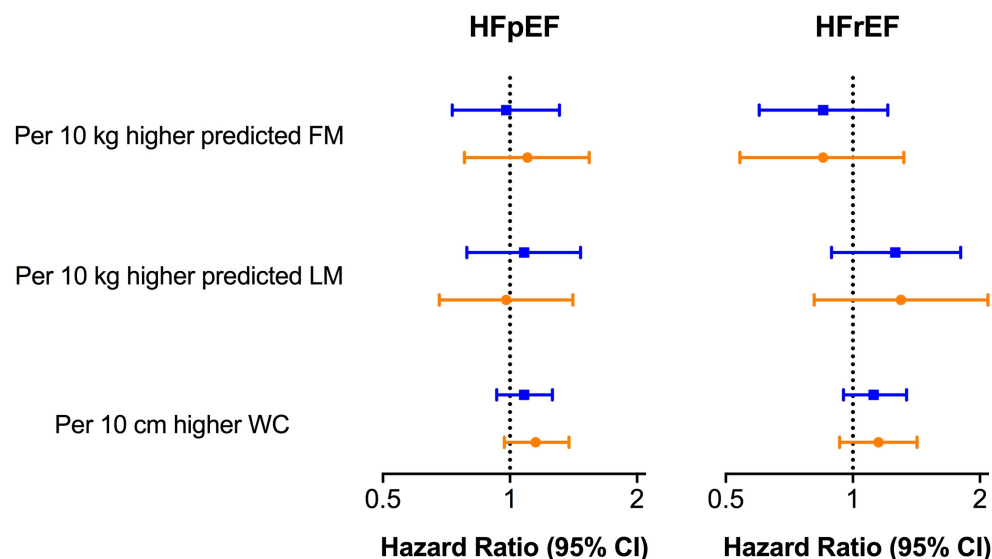

Hazard ratio (95% CI) for all study participants are shown in blue/squares. Hazard ratio (95% CI) for study participants with no prior history of cardiovascular disease are shown in orange/circles.

Multivariable adjusted Cox proportional hazard models were constructed for each HF outcome and body composition exposure variable with adjustment for the following potential confounders: Age, sex, race/ethnicity, education, income, treatment group, baseline CRF, history of hypertension, systolic BP, smoking status, alcohol use status, estimated GFR, diabetes duration, insulin use, HbA1c, history of CVD (only in the analysis including all study participants), predicted fat mass (except for WC model), predicted lean mass (except for WC model)

Abbreviations: BP = blood pressure; CI = confidence interval; CRF = cardiorespiratory fitness; CVD = cardiovascular disease; GFR = glomerular filtration rate; HbA1c = glycated hemoglobin; HFpEF = heart failure with preserved ejection fraction; HFrEF = heart failure with reduced ejection fraction; HR = hazard ratio; WC = waist circumference

**Supplemental Figure IV. Multivariable adjusted associations of changes in body composition measures from baseline to 1-year follow-up with risk of HFpEF and HFrEF among all study participants (blue/squares) and those with no prior history of cardiovascular disease (orange/circles)**

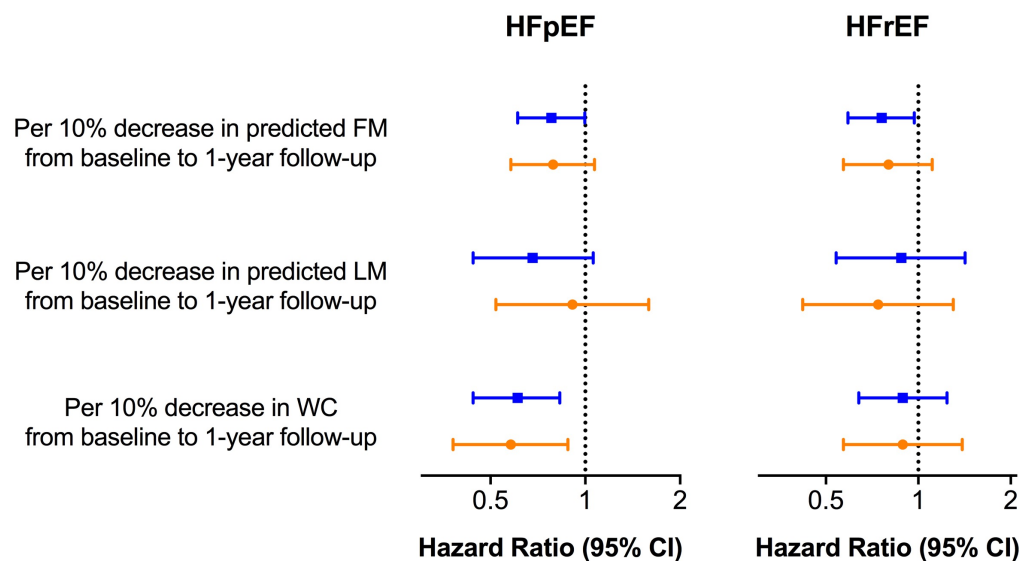

Hazard ratio (95% CI) for all study participants are shown in blue/squares. Hazard ratio (95% CI) for study participants with no prior history of cardiovascular disease are shown in orange/circles.

Multivariable adjusted Cox proportional hazard models were constructed for each HF outcome and body composition exposure variable with adjustment for the following potential confounders: Age, sex, race/ethnicity, education, income, treatment group, baseline CRF, history of hypertension, systolic BP, smoking status, alcohol use status, estimated GFR, diabetes duration, insulin use, HbA1c, history of CVD (only in the analysis including all study participants), year 1 percent change in predicted fat mass (except for WC model), year 1 percent change in predicted lean mass (except for WC model), year 1 percent change in HbA1c, year 1 percent change in systolic BP

Abbreviations: BP = blood pressure; CI = confidence interval; CRF = cardiorespiratory fitness; CVD = cardiovascular disease; GFR = glomerular filtration rate; HbA1c = glycated hemoglobin; HFpEF = heart failure with preserved ejection fraction; HFrEF = heart failure with reduced ejection fraction; HR = hazard ratio; WC = waist circumference

## Online Appendix: Look AHEAD Research Group at End of Continuation

### Clinical Sites

The Johns Hopkins University Frederick L. Brancati, MD, MHS<sup>1\*</sup>; Jeanne M. Clark, MD, MPH<sup>1</sup> (Co-Principal Investigators); Lee Swartz<sup>2</sup>; Jeanne Charleston, RN<sup>3</sup>; Lawrence Cheskin, MD<sup>3</sup>; Richard Rubin, PhD<sup>3\*</sup>; Jean Arceci, RN; David Bolen; Danielle Diggins; Mia Johnson; Joyce Lambert; Sarah Longenecker; Kathy Michalski, RD; Dawn Jiggetts; Chanchai Sapun; Maria Sowers; Kathy Tyler

\*deceased

Pennington Biomedical Research Center George A. Bray, MD<sup>1</sup>; Allison Strate, RN<sup>2</sup>; Frank L. Greenway, MD<sup>3</sup>; Donna H. Ryan, MD<sup>3</sup>; Donald Williamson, PhD<sup>3</sup>; Timothy Church, MD<sup>3</sup>; Catherine Champagne, PhD, RD; Valerie Myers, PhD; Jennifer Arceneaux, RN; Kristi Rau; Michelle Begnaud, LDN, RD, CDE; Barbara Cerniauskas, LDN, RD, CDE; Crystal Duncan, LPN; Helen Guay, LDN, LPC, RD; Carolyn Johnson, LPN, Lisa Jones; Kim Landry; Missy Lingle; Jennifer Perault; Cindy Puckett; Marisa Smith; Lauren Cox; Monica Lockett, LPN

The University of Alabama at Birmingham Cora E. Lewis, MD, MSPH<sup>1</sup>; Sheikilya Thomas, PhD, MPH<sup>2</sup>; Monika Safford, MD<sup>3</sup>; Stephen Glasser, MD<sup>3</sup>; Vicki DiLillo, PhD<sup>3</sup>; Gareth Dutton, PhD, Charlotte Bragg, MS, RD, LD; Amy Dobelstein; Sara Hannum; Anne Hubbell, MS; Jane King, MLT; DeLavallade Lee; Andre Morgan; L. Christie Oden; Janet Wallace, MS; Cathy Roche, PhD, RN, BSN; Jackie Roche; Janet Turman

### Harvard Center

Massachusetts General Hospital. David M. Nathan, MD<sup>1</sup>; Enrico Cagliero, MD<sup>3</sup>; Heather Turgeon, RN, BS, CDE<sup>2</sup>; Barbara Steiner, EdM; Valerie Goldman, MS, RDN<sup>2</sup>; Linda Delahanty, MS, RDN<sup>3</sup>; Ellen Anderson, MS, RDN<sup>3</sup>; Laurie Bissett, MS, RDN; Christine Stevens, RN; Mary Larkin, RN; Kristen Dalton, BS, Roshni Singh, BS

Joslin Diabetes Center. Edward S. Horton, MD<sup>1</sup>; Sharon D. Jackson, MS, RD, CDE<sup>2</sup>; Osama Hamdy, MD, PhD<sup>3</sup>; A. Enrique Caballero, MD<sup>3</sup>; Sarah Bain, BS; Elizabeth McKinney, BSN, RN; Barbara Fargnoli, MS, RD; Jeanne Spellman, BS, RD; Kari Galuski, RN; Ann Goebel-Fabbri, PhD; Lori Lambert, MS, RD; Sarah Ledbury, MEd, RD; Maureen Malloy, BS; Kerry Ovalle, MS, RCEP, CDE

Beth Israel Deaconess Medical Center. George Blackburn, MD, PhD<sup>1\*</sup> Christos Mantzoros, MD, DSc<sup>3</sup>; Ann McNamara, RN

\*deceased

University of Colorado Anschutz Medical Campus James O. Hill, PhD<sup>1</sup>; Marsha Miller, MS RD<sup>2</sup>; Holly Wyatt, MD<sup>3</sup>; Brent Van Dorsten, PhD<sup>3</sup>; Judith Regensteiner, PhD<sup>3</sup>; Debbie Bochert; Gina Claxton-Malloy RD Ligia Coelho, BS; Paulette Cohrs, RN, BSN; Susan Green; April Hamilton, BS, CCRC; Jere Hamilton, BA; Eugene Leshchinskiy; Loretta Rome, TRS; Terra Thompson, BA, Kirstie Craul, RD, CDE; Cecilia Wang, MD

Baylor College of Medicine John P. Foreyt, PhD<sup>1</sup>; Rebecca S. Reeves, DrPH, RD<sup>2</sup>; Molly Gee, MEd, RD<sup>2</sup>; Henry Pownall, PhD<sup>3</sup>; Ashok Balasubramanyam, MBBS<sup>3</sup>; Chu-Huang Chen, MD,

PhD<sup>3</sup>; Peter Jones, MD<sup>3</sup>; Michele Burrington, RD, RN; Allyson Clark Gardner, MS, RD; Sharon Griggs; Michelle Hamilton; Veronica Holley; Sarah Lee; Sarah Lane Liscum, RN, MPH; Susan Cantu-Lumbreras; Julieta Palencia, RN; Jennifer Schmidt; Jayne Thomas, RD; Carolyn White; Charlyne Wright, RN; Monica Alvarez, PCT

The University of Tennessee Health Science Center

*University of Tennessee East.* Karen C. Johnson, MD, MPH<sup>□</sup>; Karen L. Wilson, BSN<sup>□</sup>; Mace Coday, PhD<sup>3</sup>; Beate Griffin, RN, BS; Donna Valenski; Polly Edwards; Brenda Fonda; Kim Ward

*University of Tennessee Downtown.* Helmut Steinburg, MD<sup>3</sup>; Carolyn Gresham, BSN<sup>□</sup>; Moana Mosby, RN; Debra Clark, LPN; Donna Green RN; Abbas E. Kitabchi, PhD, MD (retired)

University of Minnesota Robert W. Jeffery, PhD<sup>1</sup>; Tricia Skarphol, MA<sup>2</sup>; John P. Bantle, MD<sup>3</sup>; J. Bruce Redmon, MD<sup>3</sup>; Richard S. Crow, MD<sup>3</sup>; Scott J. Crow, MD<sup>3</sup>; Manami Bhattacharya, BS; Cindy Bjerk, MS, RD; Kerrin Brelje, MPH, RD; Carolynne Campbell; Mary Ann Forseth, BA; Melanie Jaeb, MPH, RD; Philip Lacher, BBA; Patti Laqua, BS, RD; Birgitta I. Rice, MS, RPh, CHES; Ann D. Tucker, BA; Mary Susan Voeller, BA

St. Luke's Roosevelt Hospital Center Xavier Pi-Sunyer, MD<sup>1</sup>; Jennifer Patricio, MS<sup>2</sup>; Carmen Pal, MD<sup>3</sup>; Lynn Allen, MD; Janet Crane, MA, RD, CDN; Lolline Chong, BS, RD; Diane Hirsch, RNC, MS, CDE; Mary Anne Holowaty, MS, CN; Michelle Horowitz, MS, RD; Les James; Raashi Mantani, MS

University of Pennsylvania Thomas A. Wadden, PhD<sup>1</sup>; Barbara J. Maschak-Carey, MSN, CDE<sup>2</sup>; Robert I. Berkowitz, MD<sup>3</sup>; Gary Foster, PhD<sup>3</sup>; Henry Glick, PhD<sup>3</sup>; Shiriki Kumanyika, PhD RD, MPH<sup>3</sup>; Yuliis Bell, BA; Raymond Carvajal, PsyD; Helen Chomentowski; Renee Davenport; Lucy Faulconbridge, PhD; Louise Hesson, MSN, CRNP; Sharon Leonard, RD; Monica Mullen, RD, MPH

University of Pittsburgh John M. Jakicic, PhD<sup>1</sup>; David E. Kelley, MD<sup>1</sup>; Jacqueline Wesche-Thobaben, RN, BSN, CDE<sup>2</sup>; Daniel Edmundowicz, MD<sup>3</sup>; Lin Ewing, PhD, RN<sup>3</sup>; Andrea Hergenroeder, PhD, PT, CCS<sup>3</sup>; Mary L. Klem, PhD, MLIS<sup>3</sup>; Mary Korytkowski, MD<sup>3</sup>; Andrea Kriska, PhD<sup>3</sup>; Lewis H. Kuller, MD, DrPH<sup>3</sup>; Amy D. Rickman, PhD, RD, LDN<sup>3</sup>; Rose Salata, MD<sup>3</sup>; Monica E. Yamamoto, DrPH, RD, FADA<sup>3</sup>; Janet Bonk, RN, MPH; Susan Copelli, BS, CTR; Rebecca Danchenko, BS; Tammy DeBruce, BA; Barbara Elnyczky; David O. Garcia, PhD; George A. Grove, MS; Patricia H. Harper, MS, RD, LDN; Susan Harrier, BS; Diane Heidingsfelder, MS, RD, CDE, LDN; Nicole L. Helbling, MS, RN; Diane Ives, MPH; Janet Krulia, RN, BSN, CDE; Juliet Mancino, MS, RD, CDE, LDN; Anne Mathews, PhD, RD, LDN; Lisa Martich, BS, RD, LDN; Meghan McGuire, MS; Tracey Y. Murray, BS; Anna Peluso, MS; Karen Quirin; Jennifer Rush, MPH; Joan R. Ritchea; Linda Semler, MS, RD, LDN; Karen Vujevich, RN-BC, MSN, CRNP; Kathy Williams, RN, MHA; Donna L. Wolf, PhD

The Miriam Hospital/Brown Medical School Rena R. Wing, PhD<sup>1</sup>; Renee Bright, MS<sup>2</sup>; Vincent Pera, MD<sup>3</sup>; Deborah Tate, PhD<sup>3</sup>; Amy Gorin, PhD<sup>3</sup>; Kara Gallagher, PhD<sup>3</sup>; Amy Bach, PhD; Barbara Bancroft, RN, MS; Anna Bertorelli, MBA, RD; Richard Carey, BS; Tatum Charron, BS; Heather Chenot, MS; Kimberley Chula-Maguire, MS; Pamela Coward, MS, RD; Lisa Cronkite, BS; Julie Currin, MD; Maureen Daly, RN; Caitlin Egan, MS; Erica Ferguson, BS, RD; Linda Foss, MPH; Jennifer Gauvin, BS; Don Kieffer, PhD; Lauren Lessard, BS; Deborah Maier, MS; JP Massaro, BS; Tammy Monk, MS; Rob Nicholson, PhD; Erin Patterson, BS; Suzanne Phelan, PhD; Hollie Raynor, PhD, RD; Douglas Raynor, PhD; Natalie Robinson, MS, RD; Deborah Robles; Jane Tavares, BS

The University of Texas Health Science Center at San Antonio Helen P. Hazuda, PhD<sup>1</sup>; Maria G. Montez, RN, MSHP, CDE<sup>2</sup>; Carlos Lorenzo, MD<sup>3</sup>; Charles F. Coleman, MS, RD; Domingo Granado, RN; Kathy Hathaway, MS, RD; Juan Carlos Isaac, RC, BSN; Nora Ramirez, RN, BSN

VA Puget Sound Health Care System / University of Washington Steven E. Kahn, MB, ChB<sup>1</sup>; Anne Kure, BS<sup>2</sup>; Edward J. Boyko, MD, MPH<sup>3</sup>; Edward Lipkin, MD, PhD<sup>3</sup>; Dace Trence, MD<sup>3</sup>; Subbulaxmi Trikudanathan, MD, MRCP, MMSc<sup>3</sup>; Elaine Tsai, MD<sup>3</sup>; Brenda Montgomery, RN, MS, CDE; Ivy Morgan-Taggart; Jolanta Socha, BS; Lonnese Taylor, RN, BS; Alan Wesley, BA

Southwestern American Indian Center, Phoenix, Arizona and Shiprock, New Mexico William C. Knowler, MD, DrPH<sup>1</sup>; Paula Bolin, RN, MC<sup>2</sup>; Tina Killean, BS<sup>2</sup>; Maria Cassidy-Begay, BSND, RND<sup>2</sup>; Katie Toledo, MS, LPC<sup>2</sup>; Cathy Manus, LPN<sup>3</sup>; Jonathan Krakoff, MD<sup>3</sup>; Jeffrey M. Curtis, MD, MPH<sup>3</sup>; Sara Michaels, MD<sup>3</sup>; Paul Bloomquist, MD<sup>3</sup>; Peter H. Bennett, MB, FRCP<sup>3</sup>; Bernadita Fallis, RN, RHIT, CCS; Diane F. Hollowbreast; Ruby Johnson; Maria Meacham, BSN, RN, CDE; Christina Morris, BA; Julie Nelson, RD; Carol Percy, RN, MS; Patricia Poorthunder; Sandra Sangster; Leigh A. Shovestull, RD, CDE; Miranda Smart; Janelia Smiley; Teddy Thomas, BS

University of Southern California Anne Peters, MD<sup>1</sup>; Siran Ghazarian, MD<sup>2</sup>; Elizabeth Beale, MD<sup>3</sup>; Kati Konersman, RD, CDE; Brenda Quintero-Varela; Edgar Ramirez; Gabriela Rios, RD; Gabriela Rodriguez, MA; Valerie Ruelas MSW, LCSW; Sara Serafin-Dokhan; Martha Walker, RD

### **Coordinating Center**

Wake Forest University Mark A. Espeland, PhD<sup>1</sup>; Judy L. Bahnson, BA, CCRP<sup>3</sup>; Lynne E. Wagenknecht, DrPH<sup>1</sup>; David Reboussin, PhD<sup>3</sup>; W. Jack Rejeski, PhD<sup>3</sup>; Alain G. Bertoni, MD, MPH<sup>3</sup>; Wei Lang, PhD<sup>3</sup>; David Lefkowitz, MD<sup>3\*</sup> Patrick S. Reynolds, MD<sup>3</sup>; Denise Houston, PhD<sup>3</sup>; Mike E. Miller, PhD<sup>3</sup>; Laura D. Baker, PhD<sup>3</sup>; Nicholas Pajewski, PhD<sup>3</sup>; Stephen R. Rapp, PhD<sup>3</sup>; Stephen Kritchevsky, PhD<sup>3</sup>; Haiying Chen, PhD, MM<sup>3</sup>; Valerie Wilson, MD<sup>3</sup>; Delia S. West, PhD<sup>3</sup>; Ron Prineas, MD<sup>3</sup>; Tandaw Samdarshi, MD<sup>3</sup>; Amelia Hodges, BS, CCRP<sup>2</sup>; Karen Wall<sup>2</sup>; Carrie C. Williams, MA, CCRP<sup>2</sup>; Andrea Anderson, MS; Jerry M. Barnes, MA; Tara D. Beckner; Delilah R. Cook; Valery S. Effoe, MD, MS; Melanie Franks, BBA; Katie Garcia, MS; Sarah A. Gaussoin, MS; Candace Goode; Michelle Gordon, MS; Lea Harvin, BS; Mary A. Hontz, BA; Don G. Hire, BS; Patricia Hogan, MS; Mark King, BS; Kathy Lane, BS; Rebecca H. Neiberg, MS; Julia T. Rushing, MS; Debbie Steinberg, BS; Jennifer Walker, MS; Michael P. Walkup, MS

\*deceased

### **Central Resources Centers**

Central Laboratory, Northwest Lipid Metabolism and Diabetes Research Laboratories Santica M. Marcovina, PhD, ScD<sup>1</sup>; Jessica Hurting<sup>2</sup>; John J. Albers, PhD<sup>3</sup>; Vinod Gaur, PhD<sup>4</sup>

### **ECG Reading Center, EPICARE, Wake Forest University School of Medicine**

Elsayed Z. Soliman MD, MSc, MS<sup>1</sup>; Charles Campbell<sup>2</sup>; Zhu-Ming Zhang, MD<sup>3</sup>; Mary Barr; Susan Hensley; Julie Hu; Lisa Keasler; Yabing Li, MD

### **Hall-Foushee Communications, Inc.**

Richard Foushee, PhD; Nancy J. Hall, MA

## **Federal Sponsors**

National Institute of Diabetes and Digestive and Kidney Diseases Mary Evans, PhD; Van S. Hubbard, MD, PhD; Susan Z. Yanovski, MD

National Heart, Lung, and Blood Institute Lawton S. Cooper, MD, MPH; Peter Kaufman, PhD, FABMR; Mario Stylianou, PhD

Centers for Disease Control and Prevention Edward W. Gregg, PhD; Ping Zhang, PhD

## **Funding and Support**

Funded by the National Institutes of Health through cooperative agreements with the National Institute of Diabetes and Digestive and Kidney Diseases: DK57136, DK57149, DK56990, DK57177, DK57171, DK57151, DK57182, DK57131, DK57002, DK57078, DK57154, DK57178, DK57219, DK57008, DK57135, and DK56992. Additional funding was provided by the National Heart, Lung, and Blood Institute; National Institute of Nursing Research; National Center on Minority Health and Health Disparities; NIH Office of Research on Women's Health; and the Centers for Disease Control and Prevention. This research was supported in part by the Intramural Research Program of the National Institute of Diabetes and Digestive and Kidney Diseases. The Indian Health Service (I.H.S.) provided personnel, medical oversight, and use of facilities. The opinions expressed in this paper are those of the authors and do not necessarily reflect the views of the I.H.S. or other funding sources.

Additional support was received from The Johns Hopkins Medical Institutions Bayview General Clinical Research Center (M01RR02719); the Massachusetts General Hospital Mallinckrodt General Clinical Research Center and the Massachusetts Institute of Technology General Clinical Research Center (M01RR01066); the Harvard Clinical and Translational Science Center (RR025758-04); the University of Colorado Health Sciences Center General Clinical Research Center (M01RR00051) and Clinical Nutrition Research Unit (P30 DK48520); the University of Tennessee at Memphis General Clinical Research Center (M01RR0021140); the University of Pittsburgh General Clinical Research Center (GCRC) (M01RR000056), the Clinical Translational Research Center (CTRC) funded by the Clinical & Translational Science Award (UL1 RR 024153) and NIH grant (DK 046204); the VA Puget Sound Health Care System Medical Research Service, Department of Veterans Affairs; and the Frederic C. Bartter General Clinical Research Center (M01RR01346).

The following organizations have committed to make major contributions to Look AHEAD: FedEx Corporation; Health Management Resources; LifeScan, Inc., a Johnson & Johnson Company; OPTIFAST® of Nestle HealthCare Nutrition, Inc.; Hoffmann-La Roche Inc.; Abbott Nutrition; and Slim-Fast Brand of Unilever North America.

Some of the information contained herein was derived from data provided by the Bureau of Vital Statistics, New York City Department of Health and Mental Hygiene.

---

<sup>1</sup> Principal Investigator

<sup>2</sup> Program Coordinator

<sup>3</sup> Co-Investigator

All other Look AHEAD staffs are listed alphabetically by site.
